# Supplementary material for: Complete Genome Sequence and Comparative Metabolic Profiling of the Prototypical Enteroaggregative Escherichia coli Strain 042
Source: PLoS One. 2010 Jan 20;5(1):e8801. doi: 10.1371/journal.pone.0008801 (PMC2808357; doi:10.1371/journal.pone.0008801)
Supplement: Table S1 — Regions of difference (RODS) in the EAEC 042 genome. (0.04 MB XLS) [file pone.0008801.s001.xls]

## Sheet: ROD_table.txt
Table S1. Regions of difference (RODS) in the EAEC 042 genome
ROD ID	Start	end	size (bp)	notes
ROD1	21439	25167	3728	Fimbrial operon 1. Present in 0157:H7 Sakai, absent in UPEC CFT073
ROD2	156371	162896	6525	Fimbrial operon 2. Sequence divergence between 0157:H7 Sakai and UPEC CFT073 strains.
ROD3	243529	276096	32567	Genomic island.Sequence divergence between 0157:H7 Sakai and UPEC CFT073 strains. Contains Type 6 secretion system, putative macrophage toxin, phage-like protein, group II intron
ROD4	284682	323159	38477	Flag-2 locus. Unique to 042
ROD5	336238	351866	15628	Sequence divergence between 0157:H7 Sakai:H7 Sakai and UPEC CFT073 strains, 0157:H7 Sakai:H7 Sakai contains cryptic prophage cryptic prophage CP-933, next to tRNA
ROD6	390402	394451	4049	Present in 0157:H7 Sakai:H7 Sakai, absent in UPEC CFT073, Haemagluttinin repeat autotransporter protein
ROD7	420665	424021	3356	Present in 0157:H7 Sakai:H7 Sakai, absent in UPEC CFT073, cyn operon (regulator, carbonic anhydrase, cyanase, cyanate transport)
ROD8	430447	439230	8783	Present in 0157:H7 Sakai, absent in UPEC CFT073, 3-hydroxyphenylpropionate degradation operons
ROD9	579409	608257	28848	Present in 0157:H7 Sakai, absent in UPEC CFT073, RTX-family protein (pseudogene?), transporter proteins (ABC, efflux, HlyD), YadA domain protein
ROD10	646229	652504	6275	Fimbrial operon 4. Present in 0157:H7 Sakai, absent in UPEC CFT073.
ROD11	660240	671196	10956	Absent in UPEC CFT073, divergent in 0157:H7 Sakai, hypothetical proteins and transposase. 0157:H7 Sakai has RHS-type protein in equivalent region
ROD12	751327	758991	7664	Present in 0157:H7 Sakai, absent in UPEC CFT073, hypothetical protein and Hsp70-like protein
ROD13	809925	814805	4880	Fimbrial operon 5. Absent in UPEC CFT073, divergent in 0157:H7 Sakai
ROD14	827773	840750	12977	Present in 0157:H7 Sakai, absent in UPEC CFT073, misc. metabolism (fermentation of glutamate?) (regulator, cob(I)yrinic acid a,c-diamide adenosyltransferase, fumarate hydratase, methylaspartate ammonia-lyase, methylaspartate mutase E chain, glutamate mutase, methylaspartate mutase S chain)
ROD15	877116	917926	40810	prophage 1. Absent in UPEC CFT073, divergent in 0157:H7 Sakai (in 0157:H7 Sakai O-island #36; cryptic prophage CP-933K), prophage, carrying bactoprenol glucosyl transferase, involved in O antigen modification, like Salmonella bacteriophage P22
ROD16	932121	934045	1924	Unique to 042, 4 hypothetical protein, part of an operon, upstream CDs is pseudogene
ROD17	1338337	1341800	3463	Partially present in 0157:H7 Sakai, absent in UPEC CFT073, regulator and putative adhesion and penetration protein, in O157 putative adhesion and penetration protein is present as a fragment and regulator is missing
ROD18	1396781	1450149	53368	prophage 2. Absent in UPEC CFT073, divergent prophage in 0157:H7 Sakai, prophage, edge of rearrangement in 0157:H7 Sakai (EDL, not Sakai), other edge see ROD26
ROD19	1493439	1502327	8888	Present in 0157:H7 Sakai, absent in UPEC CFT073, misc amino metabolism (transporter, glutamine synthetase, 4-aminobutyrate aminotransferase)
ROD20	1521942	1527324	5382	Present in 0157:H7 Sakai, absent in UPEC CFT073, aminobenzoyl-glutamate utilization proteins (regulator, transporter, 2 utilization proteins)
ROD21	1533876	1584276	50400	prophage 3. Absent in UPEC CFT073, divergent in 0157:H7 Sakai, prophage, carrying iron transport proteins (x4)
ROD22	1655792	1659600	3808	Sequence divergence between 0157:H7 Sakai and UPEC CFT073 strains, hypothetical proteins
ROD23	1671084	1674933	3849	Present in 0157:H7 Sakai, absent in UPEC CFT073, hypothetical proteins (x3) and porin
ROD24	1686155	1692119	5964	Present in 0157:H7 Sakai, absent in UPEC CFT073, ABC transport system and D-Ala-D-Ala dipeptidase, Zn-dependent
ROD25	1724477	1738611	14134	Present in 0157:H7 Sakai, absent in UPEC CFT073, misc region (Pertactin domain protein (pseudogene?), carbohydrate kinase, regulators, ABC transporter, aldolase)
ROD26	1763886	1811200	47314	prophage 4. Absent in UPEC CFT073, divergent in 0157:H7 Sakai, carrying exonuclease, edge of rearrangement in 0157:H7 Sakai (EDL, not Sakai), other edge see ROD18
ROD27	1832521	1843545	11024	prophage like region. Unique to 042
ROD28	2052698	2058847	6149	Present in 0157:H7 Sakai, absent in UPEC CFT073, misc utilization operon (regulator, tartrate dehydrogenase/decarboxylase, putative betaine/choline/glycine transport protein and misc. dioxygenase)
ROD30	2214943	2256641	41698	Prophage 5. Absent in UPEC CFT073, divergent in 0157:H7 Sakai, carrying exonuclease VIII
ROD30A	2256892	2272385	15493	prophage 6. Absent in UPEC CFT073, divergent in 0157:H7 Sakai, carrying exonuclease VIII
ROD31	2273544	2305391	31847	Present in UPEC CFT073, absent in 0157:H7 Sakai, putative siderophore cluster (regulation, biosysnthesis, transport and receptor)
ROD32	2321564	2346166	24602	Genomic island 1. Absent in 0157:H7 Sakai, divergent in UPEC CFT073, carries transposases, hypothetical proteins and Pertactin domain-containing autotransporter protein)
ROD33	2363198	2399367	36169	Sequence divergence between 0157:H7 Sakai and UPEC CFT073 strains, O antigen genes (x5) O-antigen gene cluster
ROD34	2551911	2560079	8168	prophage-like. Unique to 042, misc. island, regulator similar to transcriptional activator of eaeA/bfpA expression in enteropathogenic E.coli, proQ, structural element that influences the osmotic activation of proP at a posttranslational level), possible prophage fragment, inserted next to tRNA, no repeat flanking island
ROD35	2591914	2599164	7250	Present in UPEC CFT073, absent in 0157:H7 Sakai, fatty acid utilization operon (regulators, transporter and transferases)
ROD36	2621345	2624617	3272	Present in 0157:H7 Sakai, absent in UPEC CFT073, misc. islet (Major Facilitator Superfamily protein-pseudogene, regulator and hypothetical protein)
ROD37	2721628	2728077	6449	Fimbrial operon 8. Sequence divergence between 0157:H7 Sakai and UPEC CFT073 strains
ROD38	2739033	2746934	7901	Present in UPEC CFT073, divergent in 0157:H7 Sakai, putative autotransporter protein-pseudogene (lacking N-terminal region) and transposases, probable deletion in 042
ROD39	2844204	2857834	13630	Present in 0157:H7 Sakai, absent in UPEC CFT073, anaerobic respiration operon (Hydrogenase 4 and Formate hydrogenlyase, regulator)
ROD40	2878688	2890486	11798	Present in UPEC CFT073, absent in 0157:H7 Sakai. carries three outer membrane proteins similar to proteins on CS54 island of Salmonella enterica serotype typhimurium
ROD41	2922497	2927740	5243	Present in 0157:H7 Sakai, absent in UPEC CFT073, 3-phenylpropionic acid catabolism operon
ROD42	3011744	3038096	26352	plasmid-like island, inserted next to tmRNA, no flanking repeats, sequence divergence between 0157:H7 Sakai and UPEC CFT073 strains. Carries plasmid replication proteins, H-NS histone family proteins. Similar to a region in Erwinia atroseptica genome,
ROD43	3100520	3104680	4160	Present in 0157:H7 Sakai, absent in UPEC CFT073, ascBF operon (regulator, PTS protein and 6-phospho-beta-glucosidase
ROD44	3124076	3126897	2821	Present in 0157:H7 Sakai, divergent in UPEC CFT073. Three subunits of hydroxyarylic acid decarboxylases/phenol carboxylase and their regulator
ROD45	3138650	3147169	8519	CRISPR-associated genes. Present in 0157:H7 Sakai, absent in UPEC CFT073, repeat array region is a different size to those found in 0157:H7 Sakai
ROD46	3249573	3276731	27158	Type III secretion system. Present in 0157:H7 Sakai, absent in UPEC CFT073, part of this region is in K12 (not TTSS)
ROD47	3338541	3342892	4351	Present in 0157:H7 Sakai, absent in UPEC CFT073, fatty acid degradation cluster, deletion in UPEC CFT073 to create gene fusion
ROD48	3387178	3441699	54521	Genomic island 2. Sequence divergence between 0157:H7 Sakai and UPEC CFT073 strains, carries putative sulfatase and Tia homologue-epithelial adherence and invasion protein, helicase, plasmid replication proteins, hypothetical protein, exported/membrane proteins, bacteriocin biosynthesis-also may have a role in siderophore production, putative acetyltransferase)
ROD49	3442891	3499011	56120	Partial present in UPEC CFT073, absent in 0157:H7 Sakai, misc. island, capsule cluster, type II secretion system, accessory colonization factor AcfD , glycolate catabolism cluster, misc. secondary metabolism(?)
ROD50	3550689	3553906	3217	Present in UPEC CFT073, absent in 0157:H7 Sakai, islet (arylsulfotransferase and Disulfide bond formation proteins, dsbl and dsbI)
ROD51	3556421	3561395	4974	Fimbrial operon 9. Present in UPEC CFT073, absent in 0157:H7 Sakai, fimbrial usher genes
ROD52	3846177	3851050	4873	Present in 0157:H7 Sakai, absent in UPEC CFT073, fructoselysine utilization operon (transporter, regulator, enzymes)
ROD53	3851158	3858567	7409	Present in UPEC CFT073, absent in 0157:H7 Sakai, misc. metabolism (contains phosphotriesterase family protein)
ROD54	3910346	3917538	7192	Fimbrial operon 10. Sequence divergence between 0157:H7 Sakai and UPEC CFT073 strains
ROD55	3964269	3979285	15016	Present in 0157:H7 Sakai, absent in UPEC CFT073, misc. secondary metaoblism (fatty acid like?)
ROD56	4013854	4020056	6202	Partially present in 0157:H7 Sakai and UPEC CFT073, arsenical resistance cluster (region deleted in other E. coli, 042 contains extra arsD and arsA)
ROD57	4122431	4130479	8048	Partial present in UPEC CFT073, absent in 0157:H7 Sakai, misc. carbohydrate catabolism (regulator, transporter, enzymes including: 3-keto-L-gulonate 6-phosphate decarboxylase, 3-epimerase, L-xylulose kinase)
ROD58	4130511	4138689	8178	Present in 0157:H7 Sakai, absent in UPEC CFT073, misc transport islet (regulators, transporter
ROD59	4180349	4185521	5172	Present in 0157:H7 Sakai, divergent in UPEC CFT073, LPS biosynthetesis genes, orthologous replacement
ROD60	4198051	4218142	20091	prophage 7. Unique to 042 (hypothetical protein, prophage maintenance system killer protein)
ROD61	4236703	4247732	11029	prophage-like. Sequence divergence between 0157:H7 Sakai and UPEC CFT073 strains (various phage proteins, amber mutation-suppressing protein, DNA primase), inserted at tRNA, flanked by repeats
ROD62	4252237	4270691	18454	Unique to 042, pathogenicity island (homologues of salmonella invasin chaperone, sicA; cell invasion protein, SipB; cell invasion protein, SipD; transcriptional regulator, HilA; large repetative protein-possible invasin)
ROD63	4294718	4299559	4841	Present in 0157:H7 Sakai, absent in UPEC CFT073, misc. sugar uptake operon (regulator, PTS protein and 6-phospho-beta-glucosidase)
ROD64	4305381	4310103	4722	Present in UPEC CFT073, absent in 0157:H7 Sakai, galactonate utilization operon
ROD65	4334993	4341871	6878	Present in 0157:H7 Sakai, divergent in UPEC CFT073, misc. proteins
ROD66	4347120	4377180	30060	Absent in UPEC CFT073, divergent in 0157:H7 Sakai, putative composite island containing integron (?), (fimbrial usher genes, chloramphenicol acteyl transferase, transposase, Streptomycin adenyltransferase, thidium bromide resistance protein, mercuric resistance operon, tetracycline resistance), IS element repeats flank integron
ROD67	4460088	4465851	5763	Unique to 042, islet, exported proteins
ROD68	4535650	4548272	12622	Present in 0157:H7 Sakai, absent in UPEC CFT073, sugar transport and utilization operon
ROD69	4831528	4948803	117275	Genomic island 3. prophage-related. Absent in 0157:H7 Sakai, divergent in UPEC CFT073, inserted at tRNA, flanked by repeats
ROD70	4995917	5000899	4982	Unique to 042, islet, misc. utilization (regulator, transporter, enzymes)
ROD71	5063137	5067364	4227	Present in 0157:H7 Sakai, divergent in UPEC CFT073, misc. metabolism (regulator, hypothetical proteins, oxidoreductase)
ROD72	5081503	5162329	80826	Divergent in 0157:H7 Sakai and UPEC CFT073, pathogenicity island, similarity to plasmid bourne proteins, (signal transduction protein, LacI regulator, PTS transporter, Major Facilitator Superfamily protein, DeoR regulator, putative choline transporter, LPS biosynthesis protein, VirK-required for proper localization of icsa (virg) at the surface of Shigella, glycosyl transferase, Fec iron(iii) dic…
