# Supplementary material for: Complete Genome Sequence and Comparative Metabolic Profiling of the Prototypical Enteroaggregative Escherichia coli Strain 042
Source: PLoS One. 2010 Jan 20;5(1):e8801. doi: 10.1371/journal.pone.0008801 (PMC2808357; doi:10.1371/journal.pone.0008801)
Supplement: Table S5 — Comparison of iron transport / storage genes from MG1655, O157 (Sakai) and O42. (0.05 MB XLS) [file pone.0008801.s005.xls]

## Sheet: K12, Sakai & O42
Table S5. Comparison of iron transport / storage genes from MG1655, O157 (Sakai) and O42
Common name	O42 systematic	O157(Sakai) Systematic	K-12 systematic	Function	Product	Comment
fhuA	Ec042-0154	ECs0154	b0150	membrane; Outer membrane constituents	outer membrane receptor protein FhuA
fhuC	Ec042-0155	ECs0155	b0151	transport; Transport of small molecules: Cations	ATP-binding component of hydroxymate-dependent iron transport
fhuD	Ec042-0156	ECs0156	b0152	transport; Transport of small molecules: Cations	ferrichrome-iron transport protein fhuD
fhuB	Ec042-0157	ECs0157	b0153	transport; Transport of small molecules: Cations	ferrichrome-iron transport protein fhuB precursor
entD	Ec042-0620	ECs0622	b0583	enzyme; Biosynthesis of cofactors, carriers: Enterochelin	enterochelin synthetase, component D
fepA	Ec042-0621	ECs0623	b0584	membrane; Transport of small molecules: Cations	outer membrane receptor for ferric enterobactin (enterochelin) and colicins B and D
fes	Ec042-0622	ECs0624	b0585	enzyme; Transport of small molecules: Cations	enterochelin esterase
entF	Ec042-0624	ECs0625	b0586	enzyme; Biosynthesis of cofactors, carriers: Enterochelin	enterobactin synthetase component EntF
fepE	Ec042-0625	ECs0626	b0587	transport; Transport of small molecules: Cations	ferric enterobactin (enterochelin) transport
fepC	Ec042-0626	ECs0627	b0588	transport; Transport of small molecules: Cations	ATP-binding component of ferric enterobactin transport
fepG	Ec042-0627	ECs0628	b0589	transport; Transport of small molecules: Cations	ferric enterobactin transport protein
fepD	Ec042-0628	ECs0629	b0590	transport; Transport of small molecules: Cations	ferric enterobactin (enterochelin) transport
entS	Ec042-0629	ECs0630	b0591	transport; Transport of small molecules: Cations	enterobactin (entrochelin) export
fepB	Ec042-0630	ECs0631	b0592	transport; Transport of small molecules: Cations	ferric enterobactin (enterochelin) binding protein periplasmic component
entC	Ec042-0631	ECs0632	b0593	enzyme; Biosynthesis of cofactors, carriers: Enterochelin	isochorismate hydroxymutase 2
entE	Ec042-0632	ECs0633	b0594	enzyme; Biosynthesis of cofactors, carriers: Enterochelin	2,3-dihydroxybenzoate-AMP ligase
entB	Ec042-0633	ECs0634	b0595	enzyme; Biosynthesis of cofactors, carriers: Enterochelin	2,3-dihydro-2,3-dihydroxybenzoate synthetase
entA	Ec042-0634	ECs0635	b0596	enzyme; Biosynthesis of cofactors, carriers: Enterochelin	2,3-dihydro-2,3-dihydroxybenzoate dehydrogenase
fur	Ec042-0711	ECs0714	b0683	regulator; Global regulatory functions	negative regulator
ybiI	Ec042-0893	ECs0881	b0803	orf; Unknown	conserved protein
ybiX	Ec042-0894	ECs0882	b0804	putative enzyme; Not classified	putative enzyme
fiu	Ec042-0895	ECs0883	b0805	putative membrane; Not classified	putative outer membrane receptor for iron transport
dps	Ec042-0902	ECs0890	b0812	regulator; Global regulatory functions	global regulator protein Dps
efeU	Ec042-1093	ECs1263	b1016	ferrous iron permease component of the EfeUOB ferrous iron transporter	transport; Transport of small molecules: Cations	Disrupted by frameshift in K-12
efeO	Ec042-1094	ECs1264	b1018	periplasmic protein component of the EfeUOB ferrous iron transporter	transport; Transport of small molecules: Cations	Cryptic in K-12
efeB	Ec042-1095	ECs1265	b1019	heme-containing component of the EfeUOB ferrous iron transporter	transport; Transport of small molecules: Cations	Cryptic in K-12
ECs1360		ECs1360			putative receptor
fhuE	Ec042-1172	ECs1480	b1102	transport; Transport of small molecules: Cations	outer membrane receptor for ferric iron uptake
tonB	Ec042-1306	ECs1752	b1252	membrane; Transport of small molecules: Cations	energy transducer TonB
yncD	Ec042-1580	ECs2055	b1451	putative transport; Not classified	predicted iron outer membrane transporter
yncE	Ec042-1581	ECs2056	b1452	putative factor; Not classified	conserved protein
ftn	Ec042-2068	ECs2613	b1905	carrier; Transport of small molecules: Cations	ferritin iron storage protein (cytoplasmic)
yoeA		ECs2792	b1995	orf; Unknown	putative outer membrane receptor for iron compound or colicin
cirA	Ec042-2388	ECs3047	b2155	membrane; Outer membrane constituents	ferric iron-catecholate outer membrane transporter
fdx	Ec042-2729	ECs3391	b2525	carrier; Energy metabolism, carbon: Electron transport	[2Fe-2S] ferredoxin
exbD	Ec042-3295	ECs3889	b3005	transport; Transport of small molecules: Cations	membrane spanning protein in TonB-ExbB-ExbD complex
exbB	Ec042-3296	ECs3890	b3006	transport; Transport of small molecules: Cations	membrane spanning protein in TonB-ExbB-ExbD complex
fitR	Ec042-3315	ECs3912		regulator of fit iron transport system	putative transcriptional regulator
fitE	Ec042-3316	ECs3913		periplasmic protein; iron transport	putative ferrichrome-binding protein
fitD	Ec042-3317	ECs3914		putative permease; iron transport	putative iron compound permease protein of ABC transporter family
fitC	Ec042-3318	ECs3915		putative permease; iron transport	putative iron compound permease protein of ABC transporter family
fitB	Ec042-3319	ECs3916		putative ATPase; iron transport	putative ABC-type iron-siderophore transport system ATP-binding protein
fitA	Ec042-3320	ECs3917		outer membrane protein; iron transport	putative ferrichrome iron receptor precursor
feoA	Ec042-3669	ECs4250	b3408	transport; Transport of small molecules: Cations	ferrous iron transporter, protein A
feoB	Ec042-3670	ECs4251	b3409	transport; Transport of small molecules: Cations	fused ferrous iron transporter, protein B: GTP-binding protein -!- membrane protein
shuS	Ec042-3794	ECs4379			putative heme/hemoglobin transport protein
shuA	Ec042-3795	ECs4380			heme utilization/transport protein
shuT	Ec042-3796	ECs4382			putative hemin binding protein
hemN	Ec042-3797	ECs4383			putative coproporphyrinogen oxidase
shuX	Ec042-3798	ECs4384			ShuX-like protein
shuY	Ec042-3799	ECs4385			ShuY-like protein
shuU	Ec042-3800	ECs4386			putative hemin permease
shuV	Ec042-3801	ECs4387			ATP binding component of hemin transport system
fhuF	Ec042-4864	ECs5327	b4367	orf; Unknown	ferric iron reductase involved in ferric hydroximate transport
ybdZ	Ec042-0623	ECs5381	b4511	orf; Unknown	conserved protein
fbpC		ECs0413		ferric transporter ATP binding subunit	putative ATP-binding component of a transport system
fbpB		ECs0414		probable ferric transport system permease,similar to ferric transport system permeases e.g. AfuB [Actinobacillus pleuropneumoniae] gi|7387527|sp|Q44123|AFUB_ACTPL percent identity 66 in 671 aa	putative ferric transport system permease
fbpA		ECs0415		probable periplasmic-iron-binding protein,similar to periplasmic-iron-binding proteins e.g. AfuA [Actinobacillus pleuropneumoniae] gi|1469286|gb|AAB05032.1| percent identity 72 in 343 aa	putative periplasmic-iron-binding protein
cusA	Ec042-0609	ECs0613	b0575	putative inner membrane component for iron transport	putative transport; Not classified
Ec042p-0149	Ec042p-0149				putative ABC transporter periplasmic solute-binding protein
Ec042p-0150	Ec042p-0150				iron ABC transporter, permease protein
Ec042p-0151	Ec042p-0151				ATP-binding component of citrate-dependent iron(III) transport protein
Ec042p-0152	Ec042p-0152				putative iron transport
fecR	Ec042-4777		b4288		regulator for fec operon, periplasmic
fecA	Ec042-4778		b4289		outer membrane receptor; citrate-dependent iron transport, outer membrane receptor
fecB	Ec042-4779		b4290		citrate-dependent iron transport, periplasmic protein; periplasmic-binding component of ABC superfamily
fecC	Ec042-4780		b4291		citrate-dependent iron(III) transport protein, cytosolic; membrane component of ABC superfamily
fecD	Ec042-4781		b4292		citrate-dependent iron transport, membrane-bound protein; membrane component of ABC superfamily
fecE	Ec042-4782		b4293		ATP-binding component of citrate-dependent iron(III) transport protein; ATP-binding component of ABC superfamily
sitA	Ec042-1521				iron transport protein; periplasmic binding protein
sitB	Ec042-1520				iron transport protein; ATP-binding component
sitC	Ec042-1519				iron transport protein; inner membrane component
sitD	Ec042-1518				iron transport protein; inner membrane component
bfr	Ec042-3598	ECs4189			bacterioferrin; iron detoxification and storage
bfd	Ec042-3599	ECs4190			bacterioferritin-associated ferredoxin
Ec042-2212	Ec042-2212				homologous to yersiniabactin transcriptional regulator, ybtA
Ec042-2213	Ec042-2213				homologous to yersiniabactin biosynthetic protein
Ec042-2214	Ec042-2214				homologous to yersiniabactin biosynthetic protein
Ec042-2215	Ec042-2215				homologous to yersiniabactin biosynthetic protein, ybtU
Ec042-2216	Ec042-2216				homologous to yersiniabactin biosynthetic protein, ybtT
Ec042-2217	Ec042-2217				homologous to yersiniabactin siderophore biosynthetic protein, ybtE
Ec042-2218	Ec042-2218				homologous to pesticin receptor precursor

## Sheet: Sheet2
Common name	K-12 systematic	O42 systematic	Product
bfd		Ec042-3599	bacterioferritin-associated ferredoxin
bfr		Ec042-3598	bacterioferrin; iron detoxification and storage
cirA	b2155	EcO42-2388	ferric iron-catecholate outer membrane transporter
cusA	b0575	EcO42-0609	putative transport; Not classified
dps	b0812	EcO42-0902	global regulator protein Dps
Ec042-2212		Ec042-2212	homologous to yersiniabactin transcriptional regulator, ybtA
Ec042-2213		Ec042-2213	homologous to yersiniabactin biosynthetic protein
Ec042-2214		Ec042-2214	homologous to yersiniabactin biosynthetic protein
Ec042-2215		Ec042-2215	homologous to yersiniabactin biosynthetic protein, ybtU
Ec042-2216		Ec042-2216	homologous to yersiniabactin biosynthetic protein, ybtT
Ec042-2217		Ec042-2217	homologous to yersiniabactin siderophore biosynthetic protein, ybtE
Ec042-2218		Ec042-2218	homologous to pesticin receptor precursor
EcO42p-0149		EcO42p-0149	putative ABC transporter periplasmic solute-binding protein
EcO42p-0150		EcO42p-0150	iron ABC transporter, permease protein
EcO42p-0151		EcO42p-0151	ATP-binding component of citrate-dependent iron(III) transport protein
EcO42p-0152		EcO42p-0152	putative iron transport
efeB	b1019	EcO42-1095	heme-containing component of the EfeUOB ferrous iron transporter		Cryptic in K-12
efeO	b1018	EcO42-1094	periplasmic protein component of the EfeUOB ferrous iron transporter		Cryptic in K-12
efeU	b1016	EcO42-1093	ferrous iron permease component of the EfeUOB ferrous iron transporter		Disrupted by frameshift in K-12
entA	b0596	EcO42-0634	2,3-dihydro-2,3-dihydroxybenzoate dehydrogenase
entB	b0595	EcO42-0633	2,3-dihydro-2,3-dihydroxybenzoate synthetase
entC	b0593	EcO42-0631	isochorismate hydroxymutase 2
entD	b0583	EcO42-0620	enterochelin synthetase, component D
entE	b0594	EcO42-0632	2,3-dihydroxybenzoate-AMP ligase
entF	b0586	EcO42-0624	enterobactin synthetase component EntF
entS	b0591	EcO42-0629	enterobactin (entrochelin) export
exbB	b3006	EcO42-3296	membrane spanning protein in TonB-ExbB-ExbD complex
exbD	b3005	EcO42-3295	membrane spanning protein in TonB-ExbB-ExbD complex
fdx	b2525	EcO42-2729	[2Fe-2S] ferredoxin
fecA	b4289	EcO42p-4778	outer membrane receptor; citrate-dependent iron transport, outer membrane receptor
fecB	b4290	EcO42p-4779	citrate-dependent iron transport, periplasmic protein; periplasmic-binding component of ABC superfamily
fecC	b4291	EcO42p-4780	citrate-dependent iron(III) transport protein, cytosolic; membrane component of ABC superfamily
fecD	b4292	EcO42p-4781	citrate-dependent iron transport, membrane-bound protein; membrane component of ABC superfamily
fecE	b4293	EcO42p-4782	ATP-binding component of citrate-dependent iron(III) transport protein; ATP-binding component of ABC superfamily
fecR	b4288	EcO42p-4777	regulator for fec operon, periplasmic
feoA	b3408	EcO42-3669	ferrous iron transporter, protein A
feoB	b3409	EcO42-3670	fused ferrous iron transporter, protein B: GTP-binding protein -!- membrane protein
fepA	b0584	EcO42-0621	outer membrane receptor for ferric enterobactin (enterochelin) and colicins B and D
fepB	b0592	EcO42-0630	ferric enterobactin (enterochelin) binding protein periplasmic component
fepC	b0588	EcO42-0626	ATP-binding component of ferric enterobactin transport
fepD	b0590	EcO42-0628	ferric enterobactin (enterochelin) transport
fepE	b0587	EcO42-0625	ferric enterobactin (enterochelin) transport
fepG	b0589	EcO42-0627	ferric enterobactin transport protein
fes	b0585	EcO42-0622	enterochelin esterase
fhuA	b0150	EcO42-0154	outer membrane receptor protein FhuA
fhuB	b0153	EcO42-0157	ferrichrome-iron transport protein fhuB precursor
fhuC	b0151	EcO42-0155	ATP-binding component of hydroxymate-dependent iron transport
fhuD	b0152	EcO42-0156	ferrichrome-iron transport protein fhuD
fhuE	b1102	EcO42-1172	outer membrane receptor for ferric iron uptake
fhuF	b4367	EcO42-4864	ferric iron reductase involved in ferric hydroximate transport
fitA		EcO42-3320	putative ferrichrome iron receptor precursor
fitB		EcO42-3319	putative ABC-type iron-siderophore transport system ATP-binding protein
fitC		EcO42-3318	putative iron compound permease protein of ABC transporter family
fitD		EcO42-3317	putative iron compound permease protein of ABC transporter family
fitE		EcO42-3316	putative ferrichrome-binding protein
fitR		EcO42-3315	putative transcriptional regulator
fiu	b0805	EcO42-0895	putative outer membrane receptor for iron transport
ftn	b1905	EcO42-2068	ferritin iron storage protein (cytoplasmic)
fur	b0683	EcO42-0711	negative regulator
hemN		EcO42-3797	putative coproporphyrinogen oxidase
shuA		EcO42-3795	heme utilization/transport protein
shuS		EcO42-3794	putative heme/hemoglobin transport protein
shuT		EcO42-3796	putative hemin binding protein
shuU		EcO42-3800	putative hemin permease
shuV		EcO42-3801	ATP binding component of hemin transport system
shuX		EcO42-3798	ShuX-like protein
shuY		EcO42-3799	ShuY-like protein
sitA		EcO42p-1521	iron transport protein; periplasmic binding protein
sitB		EcO42p-1520	iron transport protein; ATP-binding component
sitC		EcO42p-1519	iron transport protein; inner membrane component
sitD		EcO42p-1518	iron transport protein; inner membrane component
tonB	b1252	EcO42-1306	energy transducer TonB
ybdZ	b4511	EcO42-0623	conserved protein
ybiI	b0803	EcO42-0893	conserved protein
ybiX	b0804	EcO42-0894	putative enzyme
yncD	b1451	EcO42-1580	predicted iron outer membrane transporter
yncE	b1452	EcO42-1581	conserved protein
yoeA	b1995		putative outer membrane receptor for iron compound or colicin
